# Supplementary material for: Using micro pillar array columns (μPAC) for the analysis of permethylated glycans
Source: Royal Society of Chemistry journal article supplement (doi:10.1039/d1an00643f), 2021-01-01
Supplement: d1an00643f1.pdf [file d1an00643f1.pdf]

# Supporting Information

## Using Micro Pillar Array Columns ( $\mu$ PAC) for the Analysis of Permethylated Glycans

Byeong Gwan Cho<sup>1</sup>, Peilin Jiang<sup>1</sup>, Mona Goli<sup>1</sup>, Sakshi Gautam<sup>1</sup>, Yehia Mechref<sup>1\*</sup>

<sup>1</sup>Department of Chemistry and Biochemistry, Texas Tech University, Lubbock, TX

79409-1061

### \*Corresponding Author

Department of Chemistry and Biochemistry

Texas Tech University

Lubbock, TX 79409-1061

Email: [yehia.mechref@ttu.edu](mailto:yehia.mechref@ttu.edu)

Tel: 806-742-3059

Fax: 806-742-1289

**Key words:** Glycan, LC-MS, Micro Pillar Array Column, Permethylation, Isomeric  
Seperation

1 **Table S1.** Assessment of chromatographic performances of each glucose unit and  
 2 glycans shown in Figure 1,2 and 3. Full width half max (FWHM), retention factor (k),  
 3 theoretical plates (N), and plate height (H) have been calculated (n=3) for each column  
 4 and conditions applied. It should be noted that the linear gradient was used.

| Glycan/<br>GU                                                                       | Sample  | Column and Condition                       | FWHM       | Retention<br>Factor (k) | Theoretical<br>Plates (N) | Theoretical<br>Plate Height<br>(H) |
|-------------------------------------------------------------------------------------|---------|--------------------------------------------|------------|-------------------------|---------------------------|------------------------------------|
|    | Dextran | μPAC 50cm, 100% MeCN<br>as Mobile Phase B  | 0.23±0.02  | 0.23±0.003              | 56637±9847                | 9.0E-4±1.7E-4                      |
|                                                                                     |         | μPAC 50cm, 80% MeCN<br>as Mobile Phase B   | 0.30±0.02  | 0.41±0.003              | 35473±3733                | 1.4E-3±1.6E-4                      |
|    | Dextran | μPAC 50cm, 100% MeCN<br>as Mobile Phase B  | 0.23±0.02  | 0.34±0.01               | 65303±9820                | 7.8E-4±1.1E-4                      |
|                                                                                     |         | μPAC 50cm, 80% MeCN<br>as Mobile Phase B   | 0.29±0.026 | 0.66±0.0034             | 53350±9147                | 9.6E-4±1.8E-4                      |
|                                                                                     |         | μPAC 200cm, 100%<br>MeCN as Mobile Phase B | 0.24±0.006 | 0.53±0.0005             | 326434±15493              | 6.1E-4±3.0E-5                      |
|                                                                                     |         | μPAC 200cm, 80% MeCN<br>as Mobile Phase B  | 0.37±0.02  | 1.13±0.007              | 254923±23662              | 7.9E-4±6.9E-5                      |
|  | Dextran | μPAC 50cm, 100% MeCN<br>as Mobile Phase B  | 0.26±0.03  | 0.48±0.003              | 62719±13428               | 8.2E-4±1.6E-4                      |
|                                                                                     |         | μPAC 50cm, 80% MeCN<br>as Mobile Phase B   | 0.28±0.01  | 0.97±0.003              | 79833±5934                | 6.3E-4±4.7E-5                      |
|                                                                                     |         | μPAC 200cm, 100%<br>MeCN as Mobile Phase B | 0.29±0.01  | 0.79±0.005              | 305941±23038              | 6.6E-4±4.7E-5                      |
|                                                                                     |         | μPAC 200cm, 80% MeCN<br>as Mobile Phase B  | 0.44±0.006 | 1.83±0.01               | 323909±8970               | 6.2E-4±1.7E-5                      |
|  | Dextran | μPAC 50cm, 100% MeCN<br>as Mobile Phase B  | 0.24±0.02  | 0.65±0.003              | 87497±10415               | 5.8E-4±7.1E-5                      |
|                                                                                     |         | μPAC 50cm, 80% MeCN<br>as Mobile Phase B   | 0.28±0.02  | 1.33±0.003              | 109430±16874              | 4.7E-4±7.9E-5                      |
|                                                                                     |         | μPAC 200cm, 100%<br>MeCN as Mobile Phase B | 0.32±0.01  | 1.12±0.007              | 360153±24686              | 5.6E-4±3.8E-5                      |
|                                                                                     |         | μPAC 200cm, 80% MeCN<br>as Mobile Phase B  | 0.47±0.02  | 2.67±0.01               | 463651±41867              | 4.3E-4±4.1E-5                      |
|  | Dextran | μPAC 50cm, 100% MeCN<br>as Mobile Phase B  | 0.25±0.02  | 0.78±0.1                | 107637±21376              | 4.8E-4±8.5E-5                      |
|                                                                                     |         | μPAC 50cm, 80% MeCN<br>as Mobile Phase B   | 0.24±0.03  | 1.69±0.003              | 211411±44126              | 2.4E-4±4.5E-5                      |
|                                                                                     |         | μPAC 200cm, 100%<br>MeCN as Mobile Phase B | 0.33±0.00  | 1.38±0.2                | 478003±3012               | 4.2E-4±2.6E-6                      |
|                                                                                     |         | μPAC 200cm, 80% MeCN<br>as Mobile Phase B  | 0.47±0.02  | 3.54±0.02               | 743642±68557              | 2.7E-4±2.6E-5                      |

| Glycan/<br>GU                                                                       | Sample         | Column and Condition                       | FWHM       | Retention<br>Factor (k) | Theoretical<br>Plates (N) | Theoretical<br>Plate Height<br>(H) |
|-------------------------------------------------------------------------------------|----------------|--------------------------------------------|------------|-------------------------|---------------------------|------------------------------------|
| 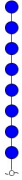   | Dextran        | μPAC 50cm, 100% MeCN<br>as Mobile Phase B  | 0.23±0.02  | 1.07±0.003              | 155163±24381              | 3.3E-4±4.7E-5                      |
|                                                                                     |                | μPAC 50cm, 80% MeCN<br>as Mobile Phase B   | 0.26±0.03  | 2.05±0.003              | 218859±41191              | 2.3E-4±4.5E-5                      |
|                                                                                     |                | μPAC 200cm, 100%<br>MeCN as Mobile Phase B | 0.36±0.04  | 1.97±0.008              | 570850±103308             | 3.6E-4±7.3E-5                      |
|                                                                                     |                | μPAC 200cm, 80% MeCN<br>as Mobile Phase B  | 0.50±0.03  | 4.40±0.0201             | 915491±90942              | 2.2E-4±2.1E-5                      |
|    | Dextran        | μPAC 50cm, 100% MeCN<br>as Mobile Phase B  | 0.23±0.02  | 1.32±0.003              | 199958±27281              | 2.5E-4±3.3E-5                      |
|                                                                                     |                | μPAC 50cm, 80% MeCN<br>as Mobile Phase B   | 0.27±0.01  | 2.40±0.003              | 254019±19286              | 2.0E-4±1.5E-5                      |
|                                                                                     |                | μPAC 200cm, 100%<br>MeCN as Mobile Phase B | 0.39±0.006 | 2.46±0.01               | 636863±18336              | 3.1E-4±9.2E-6                      |
|                                                                                     |                | μPAC 200cm, 80% MeCN<br>as Mobile Phase B  | 0.49±0.02  | 5.22±0.02               | 1262185±122126            | 1.6E-4±1.5E-5                      |
|   | Dextran        | μPAC 50cm, 100% MeCN<br>as Mobile Phase B  | 0.33±0.02  | 1.58±0.003              | 114186±14558              | 4.4E-4±5.3E-5                      |
|                                                                                     |                | μPAC 50cm, 80% MeCN<br>as Mobile Phase B   | 0.35±0.03  | 2.72±0.000              | 180026±32439              | 2.8E-4±4.8E-5                      |
|                                                                                     |                | μPAC 200cm, 100%<br>MeCN as Mobile Phase B | 0.38±0.09  | 2.96±0.009              | 1000105±549898            | 2.4E-4±1.0E-4                      |
|                                                                                     |                | μPAC 200cm, 80% MeCN<br>as Mobile Phase B  | 0.55±0.01  | 5.97±0.02               | 1252561±48146             | 1.6E-4±6.3E-6                      |
| GU11                                                                                | Dextran        | μPAC 50cm, 100% MeCN<br>as Mobile Phase B  | 0.34±0.03  | 1.84±0.003              | 136067±20525              | 3.7E-4±5.4E-5                      |
|                                                                                     |                | μPAC 50cm, 80% MeCN<br>as Mobile Phase B   | 0.37±0.03  | 3.02±0.0000             | 194830±31271              | 2.6E-4±4.4E-5                      |
|  | Ribonuclease B | Thermo PepMap 15cm                         | 0.45±0.03  | 0.68±0.001              | 17302±2397                | 8.8E-4±1.2E-4                      |
|                                                                                     |                | μPAC 50cm, 100% MeCN<br>as Mobile Phase B  | 0.33±0.05  | 0.21±0.02               | 34606±9861                | 1.5E-3±4.1E-4                      |
|                                                                                     |                | μPAC 50cm, 80% MeCN<br>as Mobile Phase B   | 0.42±0.01  | 0.47±0.003              | 30040±1413                | 1.7E-3±7.8E-5                      |
|  | Ribonuclease B | Thermo PepMap 15cm                         | 0.46±0.04  | 0.96±0.004              | 23017±3329                | 6.6E-4±1.0E-4                      |
|                                                                                     |                | μPAC 50cm, 100% MeCN<br>as Mobile Phase B  | 0.33±0.01  | 0.32±0.02               | 37602±2766                | 1.3E-3±9.4E-5                      |
|                                                                                     |                | μPAC 50cm, 80% MeCN<br>as Mobile Phase B   | 0.54±0.04  | 0.70±0.002              | 24311±3551                | 2.1E-3±3.2E-4                      |
|  | Ribonuclease B | Thermo PepMap 15cm                         | 0.82±0.6   | 1.29±0.001              | 9936±1548                 | 1.5E-3±2.2E-4                      |
|                                                                                     |                | μPAC 50cm, 100% MeCN<br>as Mobile Phase B  | 0.30±0.09  | 0.43±0.02               | 60986±27591               | 9.9E-4±5.6E-4                      |

| Glycan/<br>GU                                                                       | Sample                                   | Column and Condition                      | FWHM       | Retention<br>Factor (k) | Theoretical<br>Plates (N) | Theoretical<br>Plate Height<br>(H) |
|-------------------------------------------------------------------------------------|------------------------------------------|-------------------------------------------|------------|-------------------------|---------------------------|------------------------------------|
| 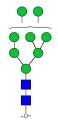   | Ribonuclease B                           | μPAC 50cm, 80% MeCN<br>as Mobile Phase B  | 0.47±0.01  | 0.93±0.005              | 41384±1764                | 1.2E-3±5.1E-5                      |
|                                                                                     |                                          | Thermo PepMap 15cm                        | 0.44±0.02  | 1.60±0.003              | 43087±4366                | 3.5E-4±3.4E-5                      |
|                                                                                     |                                          | μPAC 50cm, 100% MeCN<br>as Mobile Phase B | 0.34±0.03  | 0.51±0.07               | 50492±8928                | 1.0E-3±1.8E-4                      |
|                                                                                     |                                          | μPAC 50cm, 80% MeCN<br>as Mobile Phase B  | 0.38±0.04  | 1.14±0.002              | 81269±18913               | 6.4E-4±1.3E-4                      |
|    | Ribonuclease B                           | Thermo PepMap 15cm                        | 0.41±0.02  | 1.94±0.006              | 66151±1529                | 2.3E-4±5.3E-6                      |
|                                                                                     |                                          | μPAC 50cm, 100% MeCN<br>as Mobile Phase B | 0.31±0.006 | 0.69±0.02               | 73307±2868                | 6.8E-4±2.6E-5                      |
|                                                                                     |                                          | μPAC 50cm, 80% MeCN<br>as Mobile Phase B  | 0.34±0.006 | 1.37±0.003              | 121965±4563               | 4.1E-4±1.5E-5                      |
|    | Fetuin                                   | Thermo PepMap 15cm                        | 1.13±0.3   | 0.96±0.004              | 12648±7732                | 1.5E-3±7.0E-4                      |
|                                                                                     |                                          | μPAC 50cm, 100% MeCN<br>as Mobile Phase B | 0.9±0.05   | 0.57±0.000              | 15916±4421                | 3.3E-3±1.0E-3                      |
|                                                                                     |                                          | μPAC 50cm, 80% MeCN<br>as Mobile Phase B  | 0.8±0.04   | 1.16±0.01               | 35461±3701                | 1.4E-3±1.4E-4                      |
|  | Fetuin                                   |                                           | 0.75±0.2   | 1.20±0.01               | 33045±13297               | 5.0E-4±1.9E-4                      |
|                                                                                     |                                          | Thermo PepMap 15cm                        | (Isomer 1) | (Isomer 1)              | (Isomer 1)                | (Isomer 1)                         |
|                                                                                     |                                          |                                           | 1.08±0.2   | 1.22±0.01               | 15017±1221                | 1.0E-3±7.8E-5                      |
|                                                                                     |                                          |                                           | (Isomer 2) | (Isomer 2)              | (Isomer 2)                | (Isomer 2)                         |
|                                                                                     |                                          | μPAC 50cm, 100% MeCN<br>as Mobile Phase B | 0.95±0.05  | 0.68±0.00               | 15714±1510                | 3.2E-3±3.0E-4                      |
|                                                                                     | μPAC 50cm, 80% MeCN<br>as Mobile Phase B | 1.05±0.05                                 | 1.4±0.007  | 24030±2199              | 2.1E-3±1.9E-4             |                                    |
|  | Fetuin                                   |                                           | 1.01±0.2   | 1.07±0.00               | 15857±5981                | 1.0E-3±3.2E-4                      |
|                                                                                     |                                          |                                           | (Isomer 1) | (Isomer 1)              | (Isomer 1)                | (Isomer 1)                         |
|                                                                                     |                                          | Thermo PepMap 15cm                        | 0.72±0.04  | 1.10±0.004              | 30519±3553                | 5.0E-4±6.2E-5                      |
|                                                                                     |                                          |                                           | (Isomer 2) | (Isomer 2)              | (Isomer 2)                | (Isomer 2)                         |
|                                                                                     |                                          |                                           | 0.85±0.2   | 1.21±0.004              | 28689±17337               | 6.5E-4±3.2E-4                      |
|                                                                                     |                                          |                                           | (Isomer 3) | (Isomer 3)              | (Isomer 3)                | (Isomer 3)                         |
|                                                                                     |                                          | μPAC 50cm, 100% MeCN<br>as Mobile Phase B | 0.77±0.02  | 0.63±0.003              | 26324±1716                | 1.9E-3±1.2E-4                      |
|                                                                                     |                                          | μPAC 50cm, 80% MeCN<br>as Mobile Phase B  | 0.91±0.1   | 1.27±0.003              | 30444±6952                | 1.7E-3±3.6E-4                      |
|  | Fetuin                                   |                                           | 0.82±0.03  | 1.28±0.004              | 27477±2096                | 5.5E-4±4.2E-5                      |
|                                                                                     |                                          | Thermo PepMap 15cm                        | (Isomer 1) | (Isomer 1)              | (Isomer 1)                | (Isomer 1)                         |
|                                                                                     |                                          |                                           | 1.12±0.03  | 1.32±0.004              | 15223±633                 | 9.9E-4±4.1E-5                      |

| Glycan/<br>GU | Sample | Column and Condition                      | FWHM       | Retention<br>Factor (k) | Theoretical<br>Plates (N) | Theoretical<br>Plate Height<br>(H) |
|---------------|--------|-------------------------------------------|------------|-------------------------|---------------------------|------------------------------------|
|               | Fetuin | μPAC 50cm, 100% MeCN<br>as Mobile Phase B | (Isomer 2) | (Isomer 2)              | (Isomer 2)                | (Isomer 2)                         |
|               |        |                                           | 0.80±0.1   | 1.38±0.004              | 32663±9199                | 4.9E-4±1.6E-4                      |
|               |        |                                           | (Isomer 3) | (Isomer 3)              | (Isomer 3)                | (Isomer 3)                         |
|               |        |                                           | 0.68±0.02  | 0.73± 0.00              | 32033±1885                | 1.6E-3±9.2E-5                      |
|               |        |                                           | (Isomer 1) | (Isomer 1)              | (Isomer 1)                | (Isomer 1)                         |
|               |        |                                           | 0.64±0.07  | 0.75±0.003              | 38616±9121                | 1.3E-3±3.0E-4                      |
|               |        | (Isomer 2)                                | (Isomer 2) | (Isomer 2)              | (Isomer 2)                |                                    |
|               |        | 1.17±0.2                                  | 0.81±0.003 | 12543±3731              | 4.2E-3±1.3E-3             |                                    |
|               |        | (Isomer 3)                                | (Isomer 3) | (Isomer 3)              | (Isomer 3)                |                                    |
|               |        | 0.68±0.04                                 | 1.46±0.009 | 62803±6729              | 8.0E-4±9.1E-5             |                                    |
|               |        | (Isomer 1)                                | (Isomer 1) | (Isomer 1)              | (Isomer 1)                |                                    |
|               |        | 0.84±0.05                                 | 1.49±0.006 | 42126±4527              | 1.2E-3±1.4E-4             |                                    |
|               |        | (Isomer 2)                                | (Isomer 2) | (Isomer 2)              | (Isomer 2)                |                                    |
|               |        | 0.90±0.1                                  | 1.60±0.01  | 40238±8629              | 1.3E-3±2.9E-4             |                                    |
|               |        | (Isomer 3)                                | (Isomer 3) | (Isomer 3)              | (Isomer 3)                |                                    |
|               | Fetuin | Thermo PepMap 15cm                        | 0.77±0.09  | 1.51±0.000              | 38600±9950                | 4E-4±9.4E-5                        |
|               |        |                                           | (Isomer 1) | (Isomer 1)              | (Isomer 1)                | (Isomer 1)                         |
|               |        |                                           | 0.93±0.08  | 1.58±0.004              | 27706±4697                | 5.5E-4±9.0E-5                      |
|               |        | (Isomer 2)                                | (Isomer 2) | (Isomer 2)              | (Isomer 2)                |                                    |
|               |        | μPAC 50cm, 100% MeCN<br>as Mobile Phase B | 0.62±0.05  | 0.82±0.006              | 43819±6119                | 1.2E-3±1.7E-4                      |
|               |        |                                           | (Isomer 1) | (Isomer 1)              | (Isomer 1)                | (Isomer 1)                         |
|               |        |                                           | 0.94±0.1   | 0.84±0.003              | 19668±4066                | 2.6E-3±5.8E-4                      |
|               |        | (Isomer 2)                                | (Isomer 2) | (Isomer 2)              | (Isomer 2)                |                                    |
|               |        | μPAC 50cm, 80% MeCN<br>as Mobile Phase B  | 0.64±0.02  | 1.62±0.006              | 80521±6349                | 6.2E-4±4.7E-5                      |
|               |        |                                           | (Isomer 1) | (Isomer 1)              | (Isomer 1)                | (Isomer 1)                         |
|               |        |                                           | 0.99±0.04  | 1.66±0.009              | 34145±2658                | 1.5E-3±1.2E-4                      |
|               |        | (Isomer 2)                                | (Isomer 2) | (Isomer 2)              | (Isomer 2)                |                                    |
|               | Fetuin | Thermo PepMap 15cm                        | 0.70±0.13  | 1.75±0.004              | 59092±25915               | 2.8E-4±1.0E-4                      |
|               |        |                                           | (Isomer 1) | (Isomer 1)              | (Isomer 1)                | (Isomer 1)                         |
|               |        |                                           | 0.85±0.1   | 1.81±0.004              | 39856±9914                | 3.9E-4±8.5E-5                      |
|               |        | (Isomer 2)                                | (Isomer 2) | (Isomer 2)              | (Isomer 2)                |                                    |
|               |        | μPAC 50cm, 100% MeCN<br>as Mobile Phase B | 1.06±0.15  | 0.95±0.003              | 17540±5512                | 3.0E-3±8.0E-4                      |
|               |        |                                           | (Isomer 1) | (Isomer 1)              | (Isomer 1)                | (Isomer 1)                         |

| Glycan/<br>GU                                                                       | Sample               | Column and Condition                                             | FWHM       | Retention<br>Factor (k) | Theoretical<br>Plates (N) | Theoretical<br>Plate Height<br>(H) |
|-------------------------------------------------------------------------------------|----------------------|------------------------------------------------------------------|------------|-------------------------|---------------------------|------------------------------------|
|                                                                                     |                      |                                                                  | 0.96±0.17  | 1.03±0.003              | 23557±7002                | 2.3E-3±8.2E-4                      |
|                                                                                     |                      |                                                                  | (Isomer 2) | (Isomer 2)              | (Isomer 2)                | (Isomer 2)                         |
|                                                                                     |                      |                                                                  | 0.97±0.1   | 1.81±0.009              | 40657±8315                | 1.3E-3±2.7E-4                      |
|                                                                                     |                      |                                                                  | (Isomer 1) | (Isomer 1)              | (Isomer 1)                | (Isomer 1)                         |
|                                                                                     |                      | μPAC 50cm, 80% MeCN<br>as Mobile Phase B                         | 0.79±0.01  | 1.91±0.006              | 64365±1373                | 7.8E-4±1.7E-5                      |
|                                                                                     |                      |                                                                  | (Isomer 2) | (Isomer 2)              | (Isomer 2)                | (Isomer 2)                         |
|                                                                                     |                      |                                                                  |            |                         |                           |                                    |
|                                                                                     |                      |                                                                  |            |                         |                           |                                    |
| 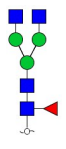   | Human Blood<br>Serum | μPAC 50cm, 80% MeCN<br>as Mobile Phase B<br>Flowrate = 0.3μL/min | 0.26±0.006 | 0.74±0.0005             | 90817±3907                | 5.5E-4±2.4E-5                      |
|                                                                                     |                      | μPAC 50cm, 80% MeCN<br>as Mobile Phase B<br>Flowrate = 0.6μL/min | 0.22±0.006 | 1.17±0.02               | 52359±2362                | 9.6E-4±4.4E-5                      |
|   | Human Blood<br>Serum | μPAC 50cm, 80% MeCN<br>as Mobile Phase B<br>Flowrate = 0.3μL/min | 0.29±0.010 | 0.89±0.0006             | 87970±6070                | 5.7E-4±3.9E-5                      |
|                                                                                     |                      | μPAC 50cm, 80% MeCN<br>as Mobile Phase B<br>Flowrate = 0.6μL/min | 0.30±0.02  | 1.42±0.02               | 36233±4616                | 1.4E-3±1.9E-4                      |
|  | Human Blood<br>Serum | μPAC 50cm, 80% MeCN<br>as Mobile Phase B<br>Flowrate = 0.3μL/min | 0.39±0.02  | 1.17±0.004              | 65458±5092                | 7.7E-4±5.8E-5                      |
|                                                                                     |                      | μPAC 50cm, 80% MeCN<br>as Mobile Phase B<br>Flowrate = 0.6μL/min | 0.39±0.01  | 1.93±0.03               | 30843±1232                | 1.6E-3±6.3E-5                      |
|  | Human Blood<br>Serum | μPAC 50cm, 80% MeCN<br>as Mobile Phase B<br>Flowrate = 0.3μL/min | 0.65±0.01  | 1.34±0.0007             | 27083±952                 | 1.8E-3±6.6E-5                      |
|                                                                                     |                      | μPAC 50cm, 80% MeCN<br>as Mobile Phase B<br>Flowrate = 0.6μL/min | 0.64±0.02  | 2.28±0.03               | 14383±535                 | 3.5E-3±1.3E-4                      |
|  | Human Blood<br>Serum | μPAC 50cm, 80% MeCN<br>as Mobile Phase B<br>Flowrate = 0.3μL/min | 0.63±0.02  | 1.94±0.0009             | 43856±2429                | 1.1E-3±6.1E-5                      |
|                                                                                     |                      | (Isomer 1)                                                       | (Isomer 1) | (Isomer 1)              | (Isomer 1)                |                                    |
|                                                                                     |                      | 0.35±0.02                                                        | 1.98±0.004 | 153213±14092            | 3.3E-4±2.9E-5             |                                    |
|                                                                                     |                      | (Isomer 2)                                                       | (Isomer 2) | (Isomer 2)              | (Isomer 2)                |                                    |
|                                                                                     |                      |                                                                  | 0.58±0.03  | 3.08±0.7                | 33512±3322                | 1.5E-3±1.4E-4                      |
|                                                                                     |                      |                                                                  | (Isomer 1) | (Isomer 1)              | (Isomer 1)                | (Isomer 1)                         |
|                                                                                     |                      |                                                                  | 0.40±0.02  | 3.54±0.03               | 73123±7957                | 6.9E-4±7.1E-5                      |

| Glycan/<br>GU | Sample | Column and Condition | FWHM       | Retention<br>Factor (k) | Theoretical<br>Plates (N) | Theoretical<br>Plate Height<br>(H) |
|---------------|--------|----------------------|------------|-------------------------|---------------------------|------------------------------------|
|               |        |                      | (Isomer 2) | (Isomer 2)              | (Isomer 2)                | (Isomer 2)                         |

1

1 **Table S2.** Summary of Glucose Unit Index (GUI) using  $\mu$ PAC columns with different  
 2 concentration of acetonitrile in mobile phase B.

| Column          | Mobile Phase A                 | Mobile Phase B                        | GUI Equation   | R <sup>2</sup> |
|-----------------|--------------------------------|---------------------------------------|----------------|----------------|
| $\mu$ PAC 50cm  | 0.1% Formic Acid in 100% Water | 0.1% Formic Acid in 80% Acetonitrile  | $y=5.7x+5.8$   | 0.9986         |
|                 |                                | 0.1% Formic Acid in 100% Acetonitrile | $y=3.8x+9.2$   | 0.9828         |
| $\mu$ PAC 200cm |                                | 0.1% Formic Acid in 80% Acetonitrile  | $y=29.6x-39.3$ | 0.9993         |
|                 |                                | 0.1% Formic Acid in 100% Acetonitrile | $y=16.4x+12.9$ | 0.9887         |

3

4

5



1 **Figure Legends**

2 **Figure S1.** Workflow used in this study.

3 **Figure S2.** Comparison of  $\mu$ PAC trapping column against PepMap trapping column for the  
4 online purification of permethylated glycans (N=5).  $\mu$ PAC Trapping Column was  
5 compared with PepMap 2cm Trap Column and various conditions were examined  
6 with  $\mu$ PAC Trapping Column. Error bars represent standard deviation. Astricks  
7 indicate the significant improvement in abundance using  $\mu$ PAC Trapping Column v.  
8 PepMap 2cm Trap Column.

9 **Figure S3.** Assessment of the effects of increased flowrate in sensitivity (N=3). While there  
10 was no obvious difference in high mannose structures, fucosylated and sialylated  
11 glycans showed noticeable decrease in sensitivity. Error bars represent standard  
12 deviation.

13 **Figure S4.** Analysis of permethylated N-glycans derived from mouse IgG using 200cm  $\mu$ PAC.  
14 Separation of terminal galactose isomers were shown in c) but not shown with core  
15 fucose in d)

16 **Figure S5.** Separation of permethylated Man8 isomers derived from human blood serum using  
17 200cm  $\mu$ PAC. MS2 spectra of each peak is shown to validate the separation of  
18 Man8 isomers.

19

20

21

22

1

2

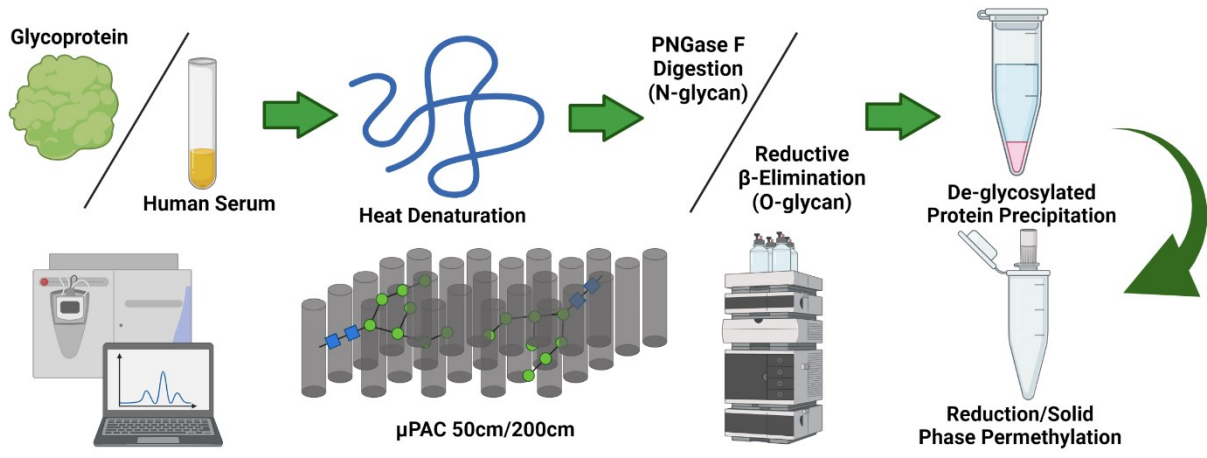

3

4

5

6

1

2

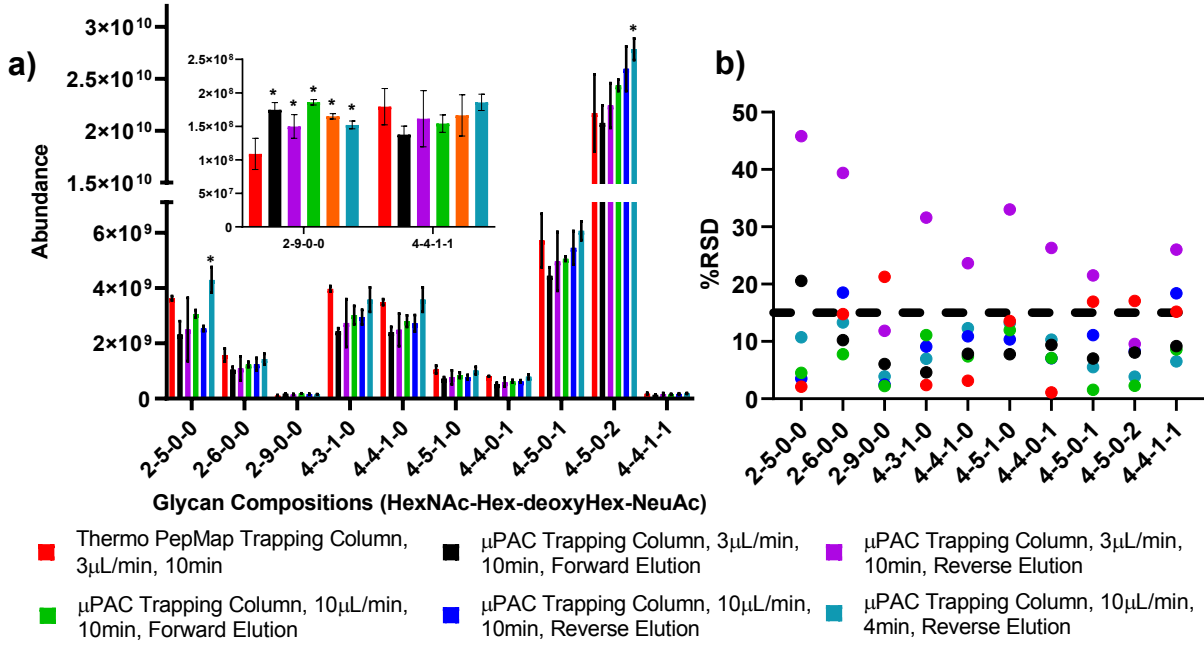

3

4

5

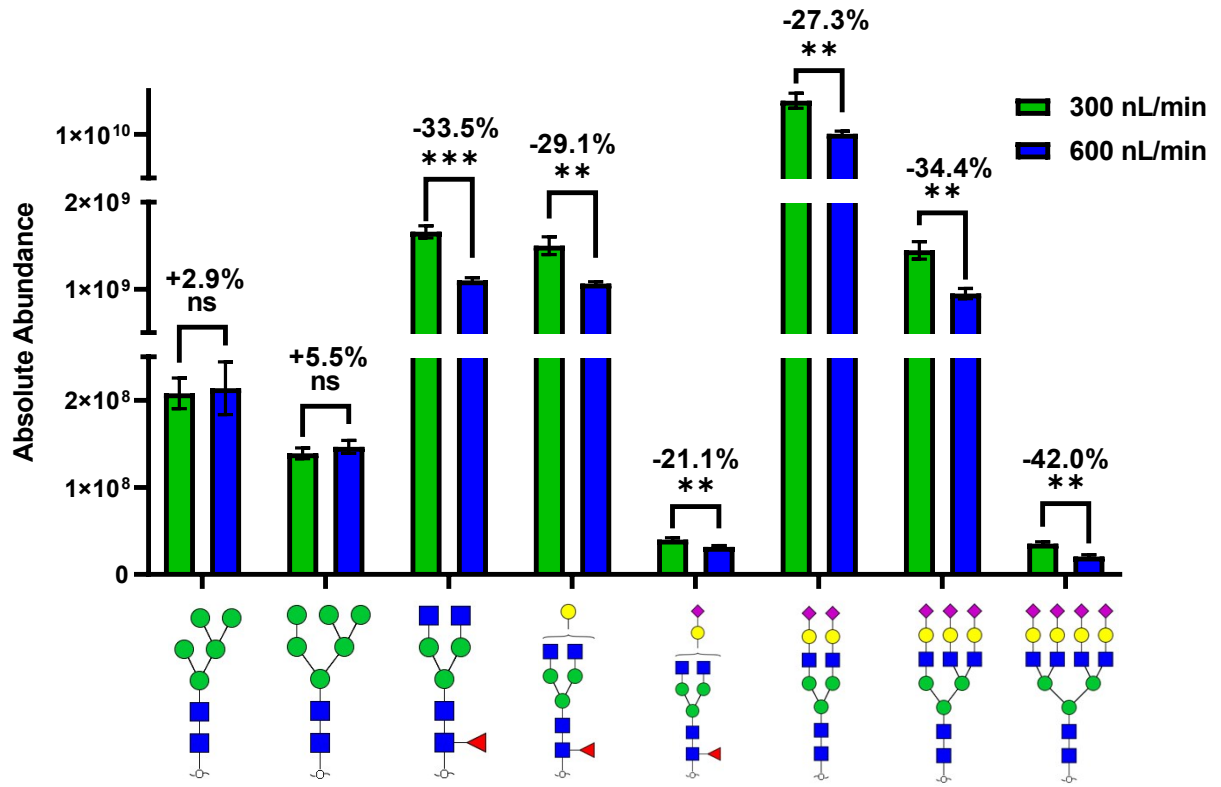

1

Cho *et al.* Figure S4

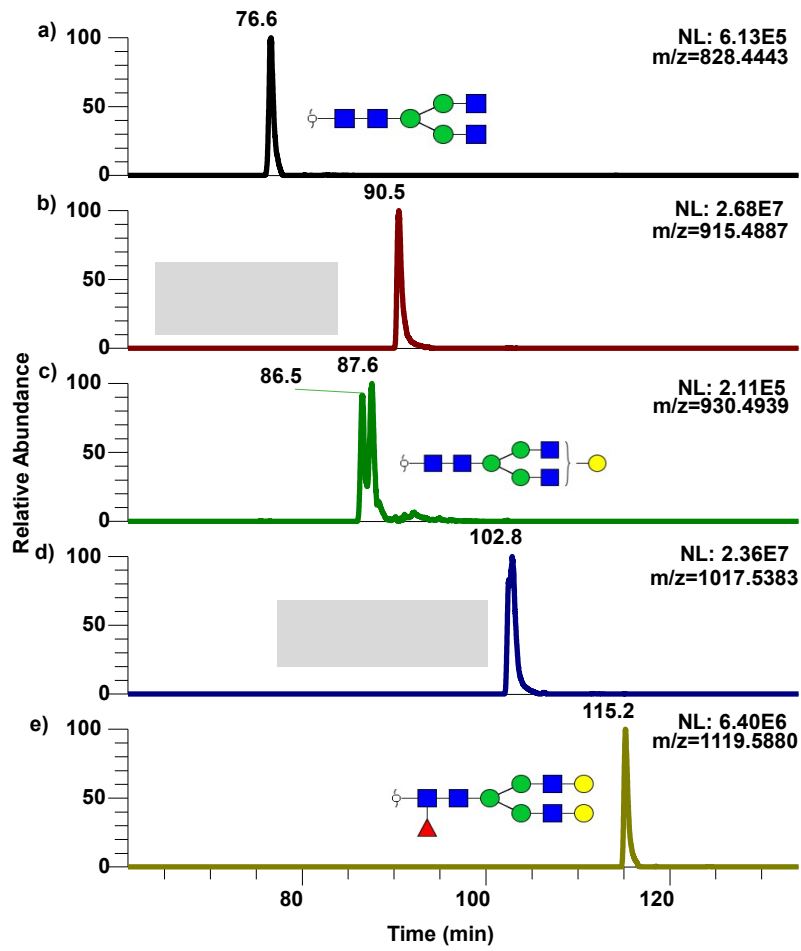

2

1

Cho et al. Figure S5

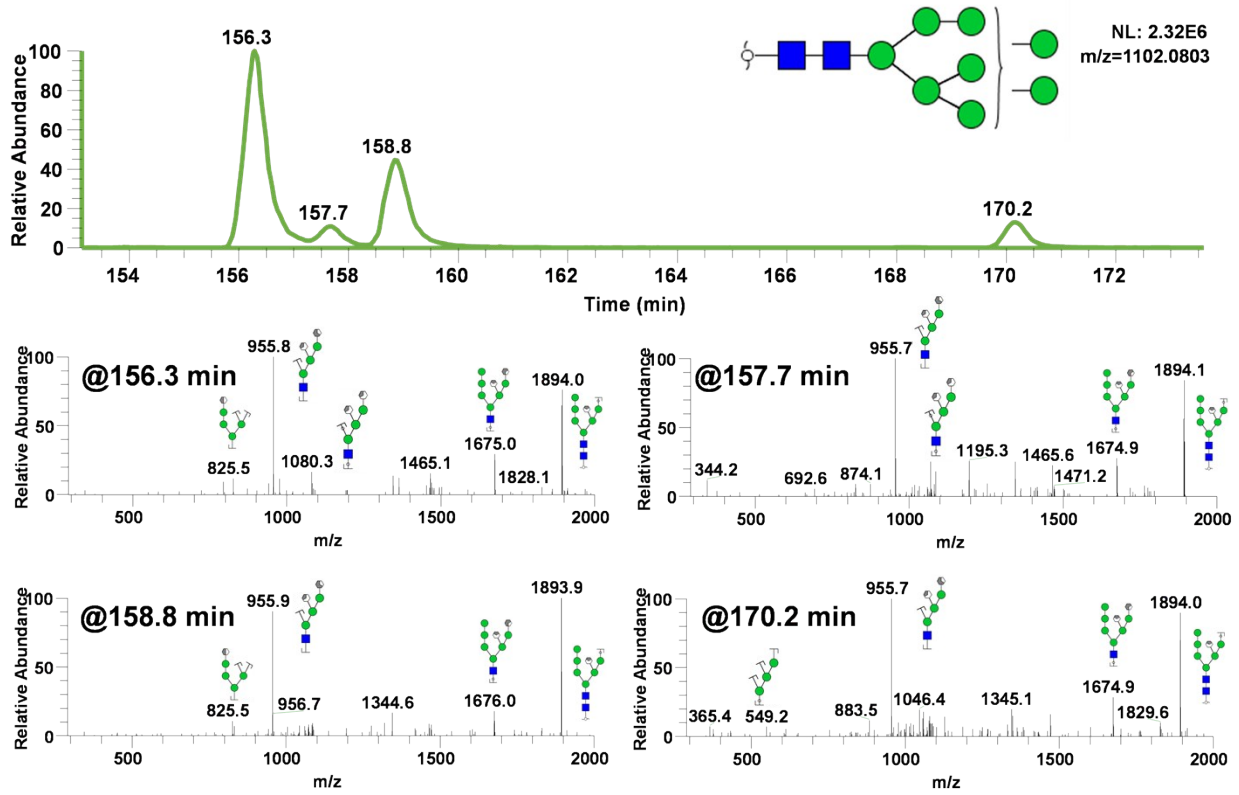

2

3

4
